# Supplementary material for: MIMIVIRE is a defence system in mimivirus that confers resistance to virophage
Source: Springer Nature journal article supplement (doi:10.1038/nature17146), 2016-02-26
Supplement: 41586_2016_BFnature17146_MOESM63_ESM.pdf [file 41586_2016_BFnature17146_MOESM63_ESM.pdf]

# SUPPLEMENTARY INFORMATION

doi:10.1038/nature17146

| Dilution | Mimivirus (Lineage A) WT |       |        | Moumouvirus (Lineage B) |       |       | Courdo7 (Lineage C) |       |       |
|----------|--------------------------|-------|--------|-------------------------|-------|-------|---------------------|-------|-------|
|          | H0                       | H24   | H48    | H0                      | H24   | H48   | H0                  | H24   | H48   |
| 1        | 17,32                    | 18,55 | 18,14  | 17,04                   | 9,4   | 10,14 | 17,23               | 9,45  | 9,09  |
| 1/2      |                          | 19,09 | 19,38  |                         | 11,64 | 11,94 |                     | 10,68 | 10,65 |
| 1/4      |                          | 19,73 | 20,8   |                         | 12,96 | 12,36 |                     | 11    | 11,78 |
| 1/8      |                          | 20,16 | 21,92  |                         | 13,78 | 13,14 |                     | 11,88 | 12,54 |
| 1/16     |                          | 21,74 | 23,33  |                         | 14,69 | 14,74 |                     | 12,73 | 13,71 |
| 1/32     |                          | 23,33 | 23,88  |                         | 16,98 | 15,18 |                     | 14,89 | 14,98 |
| 1/64     |                          | 24,7  | 24,332 |                         | 17,33 | 17,88 |                     | 16,22 | 15,37 |
| 1/128    |                          | 25,66 | 26,09  |                         | 17,96 | 18,47 |                     | 17,97 | 16,21 |
| 1/256    |                          | 26,23 | 27,14  |                         | 18,56 | 19,74 |                     | 18,73 | 16,9  |
| 1/512    |                          | 27,1  | 27,82  |                         | 19,47 | 19,99 |                     | 19,25 | 17,36 |
| 1/1024   |                          | 28,73 | 28,45  |                         | 20,38 | 20,69 |                     | 21,09 | 18,2  |
| 1/2048   |                          | 30,34 | 30,03  |                         | 21,17 | 21,03 |                     | 21,98 | 19,79 |
| 1/4096   |                          | 32,55 | 32,11  |                         | 22,25 | 22,14 |                     | 22,72 | 21,39 |
| 1/8192   |                          | 33,34 | 32,99  |                         | 22,91 | 23,88 |                     | 23,13 | 22,82 |

| Dilution | R349 - Assay 1 |       |       | R349 - Assay 2 |       |       | R349 - Assay 3 |       |       |
|----------|----------------|-------|-------|----------------|-------|-------|----------------|-------|-------|
|          | H0             | H24   | H48   | H0             | H24   | H48   | H0             | H24   | H48   |
| 1        | 16,93          | 13,06 | 12,43 | 17,73          | 13,81 | 12,42 | 16,91          | 12,34 | 12,94 |
| 1/2      |                | 14,56 | 13,64 |                | 14,64 | 13,55 |                | 13,66 | 13,34 |
| 1/4      |                | 15,34 | 14,28 |                | 15,93 | 14,36 |                | 14,84 | 14,88 |
| 1/8      |                | 16,42 | 15,61 |                | 16,42 | 15,67 |                | 15,34 | 14,91 |
| 1/16     |                | 17,63 | 15,72 |                | 17,42 | 16,91 |                | 16,28 | 15,41 |
| 1/32     |                | 18,71 | 16,35 |                | 18,23 | 17,85 |                | 17,97 | 16,37 |
| 1/64     |                | 19,2  | 17,59 |                | 19,41 | 18,75 |                | 18,53 | 17,52 |
| 1/128    |                | 20,34 | 18,91 |                | 20,34 | 19,64 |                | 19,76 | 18,19 |
| 1/256    |                | 21,31 | 20,09 |                | 21,56 | 20,19 |                | 20,44 | 19,34 |
| 1/512    |                | 22    | 20,97 |                | 22,57 | 21,33 |                | 21,12 | 20,44 |
| 1/1024   |                | 23,42 | 21,43 |                | 23,7  | 22,56 |                | 22,31 | 21,75 |
| 1/2048   |                | 24,39 | 22,62 |                | 24,58 | 23,57 |                | 23,41 | 22,69 |
| 1/4096   |                | 25,97 | 23,37 |                | 25,13 | 24,14 |                | 24,58 | 23,63 |
| 1/8192   |                | 26,46 | 24,76 |                | 26,98 | 25,77 |                | 25,37 | 24,22 |

| Dilution | R350 - Assay 1 |       |       | R350 - Assay 2 |       |       | R350 - Assay 3 |       |       |
|----------|----------------|-------|-------|----------------|-------|-------|----------------|-------|-------|
|          | H0             | H24   | H48   | H0             | H24   | H48   | H0             | H24   | H48   |
| 1        | 16,93          | 14,35 | 13,87 | 17,23          | 15,61 | 13,12 | 16,73          | 14,24 | 14,09 |
| 1/2      |                | 15,89 | 15,09 |                | 16,89 | 14,32 |                | 15,36 | 14,56 |
| 1/4      |                | 16,91 | 16,29 |                | 17,91 | 15,57 |                | 16,67 | 15,74 |
| 1/8      |                | 17,52 | 17,21 |                | 18,27 | 16,74 |                | 17,71 | 16,82 |
| 1/16     |                | 18,29 | 18,92 |                | 19,32 | 17,79 |                | 18,41 | 17,32 |
| 1/32     |                | 19,67 | 19,34 |                | 20,41 | 18,49 |                | 19,54 | 18,93 |
| 1/64     |                | 20,49 | 20,71 |                | 21,85 | 19,63 |                | 20,62 | 19,64 |
| 1/128    |                | 21,92 | 21,39 |                | 23,09 | 20,55 |                | 21,1  | 20,79 |
| 1/256    |                | 22,23 | 22,83 |                | 23,99 | 21,51 |                | 22,39 | 21,95 |
| 1/512    |                | 23,88 | 23,42 |                | 24,21 | 22,34 |                | 23,41 | 22,48 |
| 1/1024   |                | 24,48 | 24,39 |                | 25,43 | 23,84 |                | 24,87 | 23,59 |
| 1/2048   |                | 25,98 | 25,81 |                | 26,65 | 24,79 |                | 25,62 | 24,34 |
| 1/4096   |                | 26,05 | 26,74 |                | 27,16 | 25,92 |                | 26,9  | 25,65 |
| 1/8192   |                | 27,82 | 27,06 |                | 29,01 | 26,84 |                | 27,78 | 26,12 |

| Dilution | R354 - Assay 1 |       |       | R354 - Assay 2 |       |       | R354 - Assay 3 |       |       |
|----------|----------------|-------|-------|----------------|-------|-------|----------------|-------|-------|
|          | H0             | H24   | H48   | H0             | H24   | H48   | H0             | H24   | H48   |
| 1        | 18,55          | 15,68 | 15,55 | 16,91          | 14,18 | 14,02 | 17,46          | 14,83 | 14,39 |
| 1/2      |                | 16,58 | 17,32 |                | 15,87 | 15,29 |                | 15,55 | 15,48 |
| 1/4      |                | 17,78 | 17,92 |                | 16,91 | 16,63 |                | 16,29 | 15,92 |
| 1/8      |                | 18,14 | 19,17 |                | 17,88 | 17,51 |                | 17,74 | 16,83 |
| 1/16     |                | 19,38 | 19,97 |                | 18,69 | 18,26 |                | 18,61 | 18,04 |
| 1/32     |                | 20,8  | 21,13 |                | 19,94 | 19,33 |                | 19,36 | 19,6  |
| 1/64     |                | 21,92 | 21,97 |                | 21,11 | 20,88 |                | 20,88 | 19,98 |
| 1/128    |                | 23,33 | 24,51 |                | 22,56 | 21,76 |                | 21,14 | 20,85 |
| 1/256    |                | 24,49 | 24,48 |                | 23,48 | 23,05 |                | 22,43 | 22,17 |
| 1/512    |                | 25,07 | 26,56 |                | 24    | 24,67 |                | 23,56 | 23,38 |
| 1/1024   |                | 26,14 | 27,47 |                | 25,38 | 25,41 |                | 24,73 | 24,49 |
| 1/2048   |                | 27,82 | 27,96 |                | 26,25 | 26,59 |                | 25,89 | 25,27 |
| 1/4096   |                | 28,45 | 29,32 |                | 28,04 | 28,17 |                | 26,63 | 26,34 |
| 1/8192   |                | 30,03 | 29,93 |                | 29,99 | 29,92 |                | 28,44 | 27,56 |

| Dilution | R349 + R350 + R354 - Assay 1 |       |       | R349, R350, R354 - Assay 2 |       |       | R349, R350, R354 - Assay 3 |       |       |
|----------|------------------------------|-------|-------|----------------------------|-------|-------|----------------------------|-------|-------|
|          | H0                           | H24   | H48   | H0                         | H24   | H48   | H0                         | H24   | H48   |
| 1        | 16,32                        | 14,98 | 12,19 | 16,03                      | 15,54 | 12,36 | 16,97                      | 15,69 | 12,03 |
| 1/2      |                              | 16,08 | 13,88 |                            | 16,38 | 13,66 |                            | 16,77 | 13,55 |
| 1/4      |                              | 17,65 | 14,69 |                            | 17,41 | 14    |                            | 17,23 | 14,62 |
| 1/8      |                              | 18,45 | 15,66 |                            | 18,95 | 15,42 |                            | 18,54 | 15,74 |
| 1/16     |                              | 19,78 | 16,41 |                            | 19,66 | 16,34 |                            | 19,61 | 16,33 |
| 1/32     |                              | 20,55 | 17,69 |                            | 20,23 | 17,52 |                            | 20,31 | 17,85 |
| 1/64     |                              | 21,05 | 18,34 |                            | 21,69 | 18,95 |                            | 21,16 | 18,36 |
| 1/128    |                              | 22,63 | 19,24 |                            | 22,36 | 19,39 |                            | 21,99 | 19,24 |
| 1/256    |                              | 23,61 | 20,19 |                            | 23,05 | 20,88 |                            | 23,08 | 21,11 |
| 1/512    |                              | 24,91 | 21,29 |                            | 24,72 | 21,77 |                            | 24,65 | 21,97 |
| 1/1024   |                              | 25,52 | 22,04 |                            | 25,78 | 22,64 |                            | 25,51 | 22,64 |
| 1/2048   |                              | 26,44 | 23,88 |                            | 26,98 | 23,04 |                            | 26,93 | 23,59 |
| 1/4096   |                              | 27,08 | 24,71 |                            | 27,69 | 24,74 |                            | 27,41 | 24,18 |
| 1/8192   |                              | 28,33 | 25,63 |                            | 28,2  | 25,66 |                            | 28,69 | 25,71 |

Supplementary Table 1. Ct values from PCR reactions after 0, 24 and 48 hours.

| Lineage          | Name                              | Country/region        | Source                    | Sequencing  | Reads generated | Coverage  | Assembly tool | Scaffold number | Genbank accession number |
|------------------|-----------------------------------|-----------------------|---------------------------|-------------|-----------------|-----------|---------------|-----------------|--------------------------|
| A                | Mimivirus fauteuil                | France (Marseille)    | Hospital water            | 454/Solid   | Paired end      | 34x       | Newbler 2.7   | 1               | CWKE00000000             |
|                  | Mimivirus longchamps              | France (Marseille)    | Decorative fountain water | 454/Solid   | Paired end      | 37x       | Newbler 2.7   | 1               | CXOV00000000             |
|                  | Mimivirus marais                  | France (Aubagne)      | Swamp                     | 454/Solid   | Paired end      | 363x      | NA            | NA              | PRJEB9199                |
|                  | Mimivirus montadette2             | France (Martigues)    | Soil                      | Solid       | Paired end      | 439x      | NA            | NA              | PRJEB9187                |
|                  | Mimivirus univirus                | France (Marseille)    | Compost                   | 454/Solid   | Paired end      | 160x      | NA            | NA              | PRJEB9188                |
|                  | Mimivirus lactours                | France (Tours)        | River                     | 454/Solid   | Paired end      | 30x       | Newbler 2.7   | 28              | CXOL00000000             |
|                  | Mimivirus PointeRouge1            | France (Marseille)    | Seawater                  | 454/Solid   | Paired end      | 30x       | Newbler 2.7   | 1               | CXOW00000000             |
|                  | Mimivirus PointeRouge2            | France (Marseille)    | Seawater                  | 454/Solid   | Paired end      | 30x       | Newbler 2.7   | 1               | CXOU00000000             |
|                  | Mimivirus T3                      | France (Marseille)    | Stagnant water            | Miseq       | Paired end      | 97x       | Abyss 2.3     | 4               | CXOR00000000             |
|                  | Mimivirus huitre A06              | Brazil                | Seafood (Oyster)          | Miseq       | Paired end      | 52x       | Abyss 2.3     | 1               | CWJT00000000             |
|                  | Mimivirus amazonia                | Brazil                | Water                     | Miseq       | Paired end      | 88x       | Abyss 2.3     | 1               | CWHO00000000             |
|                  | Mimivirus battle7                 | France (Sainte Baume) | Soil                      | Miseq       | Paired end      | 12x       | Abyss 2.3     | 18              | CWJW00000000             |
|                  | Mimivirus battle19                | France (Marseille)    | Soil                      | Miseq       | Paired end      | 62x       | Abyss 2.3     | 4               | CWJX00000000             |
|                  | Mimivirus battle27                | France (Marseille)    | Sink swab                 | Miseq       | Paired end      | 40x       | Abyss 2.3     | 4               | CWJS00000000             |
|                  | Mimivirus battle57                | France (Marseille)    | Soil                      | Miseq       | Paired end      | 120x      | Abyss 2.3     | 3               | CWJZ00000000             |
|                  | Mimivirus battle66                | France (Marseille)    | Soil                      | Miseq       | Paired end      | 97x       | Abyss 2.3     | 3               | CWKA00000000             |
|                  | Mimivirus battle83                | France (Marseille)    | Soil                      | Miseq       | Paired end      | 117x      | Abyss 2.3     | 5               | CWKG00000000             |
|                  | Mimivirus battle86                | France (Marseille)    | Sink swab                 | Miseq       | Paired end      | 372x      | Abyss 2.3     | 5               | CWKD00000000             |
|                  | Mimivirus T2                      | France (Marseille)    | Stagnant water            | Miseq       | Paired end      | 167x      | Abyss 2.3     | 2               | CXOT00000000             |
|                  | Mimivirus battle6                 | France (Marseille)    | Bathtub swab              | Miseq       | Paired end      | 92x       | Abyss 2.3     | 4               | CWJU00000000             |
| Mimivirus dakar4 | Senegal (Dakar)                   | Sewage                | Miseq                     | Paired end  | 174x            | Abyss 2.3 | 4             | CWKF00000000    |                          |
| B                | Moumouvirus ochan                 | France (Marseille)    | Compost                   | 454/Solid   | Paired end      | 51x       | Newbler 2.7   | 1               | CXPE00000000             |
|                  | Moumouvirus istres                | France (Istres)       | Soil                      | Solid       | Paired end      | 222x      | NA            | NA              | PRJEB9189                |
|                  | Moumouvirus battle49              | France (Cassis)       | Soil                      | Miseq       | Paired end      | 96x       | Abyss 2.3     | 8               | CXOS00000000             |
|                  | Moumouvirus saoudian              | Saudi Arabia (Jeddah) | Sewage                    | Miseq       | Paired end      | 60x       | Abyss 2.3     | 7               | CXOQ00000000             |
|                  | Moumouvirus bougl                 | Tunisia (Gafsa)       | Hypersaline soil          | 454/Solid   | Paired end      | 95x       | NA            | NA              | PRJEB9190                |
| C                | Megavirus sete2                   | France (Sète)         | Soil                      | Solid       | Paired end      | 50x       | NA            | NA              | PRJEB9191                |
|                  | Megavirus shan                    | Tunisia (Tunis)       | Stool                     | Solid/Miseq | Paired end      | 44x       | Abyss 2.3     | 2               | CWIL00000000             |
|                  | Megavirus terrain en construction | France (Marseille)    | Soil                      | Solid       | Paired end      | 323x      | NA            | NA              | PRJEB9192                |
|                  | Megavirus courdo5                 | France (Marseille)    | Rivers                    | 454/Solid   | Paired end      | 28x       | Newbler 2.7   | 1               | CWID00000000             |
|                  | Megavirus bus                     | France (Marseille)    | Cooling tower water       | 454/Solid   | Paired end      | 23x       | Newbler 2.7   | 1               | CWIQ00000000             |
|                  | Megavirus montpellier3            | France (Montpellier)  | Decorative fountain water | 454/Solid   | Paired end      | 33x       | Newbler 2.7   | 1               | CWIA00000000             |
|                  | Megavirus mont1                   | Tunisia (Tunis)       | Soil (mountain)           | Miseq       | Paired end      | 24x       | Abyss 2.3     | 3               | CWIO00000000             |
|                  | Megavirus avenue9                 | Tunisia (Tunis)       | Soil                      | 454/Solid   | Paired end      | 19x       | Newbler 2.7   | 1               | CWHN00000000             |
|                  | Megavirus balcon                  | France (Marseille)    | Soi                       | Solid       | Paired end      | 424x      | NA            | NA              | PRJEB9194                |
|                  | Megavirus potager                 | France (Marseille)    | Soil (potato garden)      | Solid       | Paired end      | 409x      | NA            | NA              | PRJEB9932                |
|                  | Megavirus ursino                  | France (Marseille)    | Huveaune sewage           | Miseq       | Paired end      | 81x       | Abyss 2.3     | 2               | CWJY00000000             |
|                  | Afrovirus urmite69                | France (Aubagne)      | Soil                      | Solid/Miseq | Paired end      | 30x       | Abyss 2.3     | 1               | CWHP00000000             |
|                  | Megavirus T1                      | France (Marseille)    | Stagnant water            | Miseq       | Paired end      | 212x      | Abyss 2.3     | 6               | CWIB00000000             |
|                  | Megavirus battle43                | France (Marseille)    | Water                     | Miseq       | Paired end      | 164x      | Abyss 2.3     | 1               | CWHV00000000             |
|                  | Megavirus T4                      | France (Marseille)    | Stagnant water            | Miseq       | Paired end      | 83x       | Abyss 2.3     | 2               | CWJR00000000             |
|                  | Megavirus montadette1             | France (Martigues)    | Soil                      | Solid       | Paired end      | 350x      | NA            | NA              | PRJEB9196                |
|                  | Megavirus feuillage               | France (Martigues)    | Soil                      | Solid       | Paired end      | 342x      | NA            | NA              | PRJEB9197                |
|                  | Megavirus J3                      | France (Marseille)    | Stagnant water            | Miseq       | Paired end      | 22x       | Abyss 2.3     | 3               | CWIN00000000             |
| Megavirus T6     | France (Marseille)                | Soil                  | Miseq                     | Paired end  | 48x             | Abyss 2.3 | 2             | CWJQ00000000    |                          |

**Supplementary Table 2. List of Megavirales strains used in this study.** The geographical and source origins are detailed as well as the sequencing method.

| Targeted gene |         | Primer sequences (Duplex) | Zamilon infection | DNA Zamilon multiplication (fold) |
|---------------|---------|---------------------------|-------------------|-----------------------------------|
| R338          | Forward | CCAUCUGCAAUUACAGCAUTT     | No                | 0                                 |
|               | Reverse | AUGCUGUAAUUGCAGAUGGTT     |                   |                                   |
| R339          | Forward | GCUUCUAAACUCCAGUAUTT      | No                | 0                                 |
|               | Reverse | AUACUGGAAGUUUAGAAGCTT     |                   |                                   |
| L340          | Forward | CCGAUAUGUUAGAACUCUUTT     | No                | 0                                 |
|               | Reverse | AAGAGUUCUAACAUAUCGGTT     |                   |                                   |
| R341          | Forward | CCUCCAGAAGAAAUUCAAUTT     | No                | 0                                 |
|               | Reverse | AUUGAAUUUCUUCUGGAGGTT     |                   |                                   |
| R342          | Forward | GGUAAUUGGUACACCAUUTT      | No                | 0                                 |
|               | Reverse | AAUGGUGUACCAAUUACCTT      |                   |                                   |
| R343          | Forward | GCAUUUGUUGGAGCUCUAUTT     | No                | 0                                 |
|               | Reverse | AUAGAGCUCCAACAAAUGCTT     |                   |                                   |
| L344          | Forward | CCC AUUGGCACCUAUCCAUTT    | No                | 0                                 |
|               | Reverse | AUGGAUAGGUGCCAAUGGGTT     |                   |                                   |
| R345          | Forward | GGACGAAUUCGAUGAUCUUTT     | No                | 0                                 |
|               | Reverse | AAGAUC AUCGAAUUCGUCCTT    |                   |                                   |
| R346          | Forward | GCUGGUAGACCUUAUCAAAATT    | No                | 0                                 |
|               | Reverse | UUUGAU AAGGUCUACCAGCTT    |                   |                                   |
| R347          | Forward | GCUACUAUUCGUAGACAAATT     | No                | 0                                 |
|               | Reverse | UUUGUCUACGAAUAGUAGCTT     |                   |                                   |
| R348          | Forward | CCUGUAAUUGACCAGUUAATT     | No                | 0                                 |
|               | Reverse | UUAACUGGUCAAUUACAGGTT     |                   |                                   |
| R349          | Forward | GGAGGUGAAAUCGAUCAUTT      | Yes               | 65                                |
|               | Reverse | AUGCAUCGAUUUCACCUCTT      |                   |                                   |
| R350          | Forward | CCGCAACUCCAGCUAUUAATT     | Yes               | 18                                |
|               | Reverse | UUA AUAGCUGGAGUUGCGGTT    |                   |                                   |
| R351          | Forward | GGAU AUUCACAUGGAUCAATT    | No                | 0                                 |
|               | Reverse | UUGAUCCAUGUGAAUUCCTT      |                   |                                   |
| L352          | Forward | CCUUCUGGAUCGUCACAAUTT     | No                | 0                                 |
|               | Reverse | AUUGUGACGAUCCAGAAGGTT     |                   |                                   |
| R353          | Forward | GGGUUGAGUAUGUUACUAATT     | No                | 0                                 |
|               | Reverse | UUAGUAACAUAUCAACCTT       |                   |                                   |
| R354          | Forward | GGACGAAUUCGAUGAUCUUTT     | Yes               | 14                                |
|               | Reverse | AAGAUC AUCGAAUUCGUCCTT    |                   |                                   |
| R355          | Forward | GCUGAUUGUGAUCAAGUUUTT     | No                | 0                                 |
|               | Reverse | AAACUUGAUCACAAUCAGCTT     |                   |                                   |
| L356          | Forward | GGUGGAAUAUCAAUUCGAAUTT    | No                | 0                                 |
|               | Reverse | AUUCGAUUGAUUUCACCTT       |                   |                                   |
| L357          | Forward | CCACAUAUCCACCCUAUUTT      | No                | 0                                 |
|               | Reverse | AUAUGGGUGGAGUAUGUGGTT     |                   |                                   |
| R358          | Forward | GGUGCUAAAAGUUGUUGUAUTT    | No                | 0                                 |
|               | Reverse | AUACAACAACUUUAGCACCTT     |                   |                                   |
| L359          | Forward | GCUCUCCUGAAAUAUCUUTT      | No                | 0                                 |
|               | Reverse | AAGAU AUUCAGGAAGAGCTT     |                   |                                   |
| L360          | Forward | GGAUUAUCGUAUUUCGCAUTT     | No                | 0                                 |
|               | Reverse | AUGC GAAUUCGAUAAUCCTT     |                   |                                   |
| L361          | Forward | GCUCAAUUGCGCAACUAUUTT     | No                | 0                                 |
|               | Reverse | AAUAGUUGCGCAAUUGAGCTT     |                   |                                   |
| R362          | Forward | GCAACAAGGUGGUAUCAUTT      | No                | 0                                 |
|               | Reverse | AUGAUUACCACCUUGUUGCTT     |                   |                                   |
| R363          | Forward | CCACUCGGAUCCAAAUAUUTT     | No                | 0                                 |
|               | Reverse | AUAAUUUGGAUCCGAGUGGTT     |                   |                                   |
| L364          | Forward | GGAUGUCCUCCAUGCAGATTT     | No                | 0                                 |
|               | Reverse | AUCUGCAUGGAGGACAUCTT      |                   |                                   |

**Supplementary Table 3. List of targeted genes and siRNA used in this study.**
